# Supplementary material
Source: HighWire-hosted journal article supplement (https://www.cmaj.ca/highwire/filestream/58914/field_highwire_adjunct_files/0/image-stein-1-at.pdf)

**Appendix 1 (as supplied by the authors): Left-sided pharyngitis with tonsillar enlargement.**

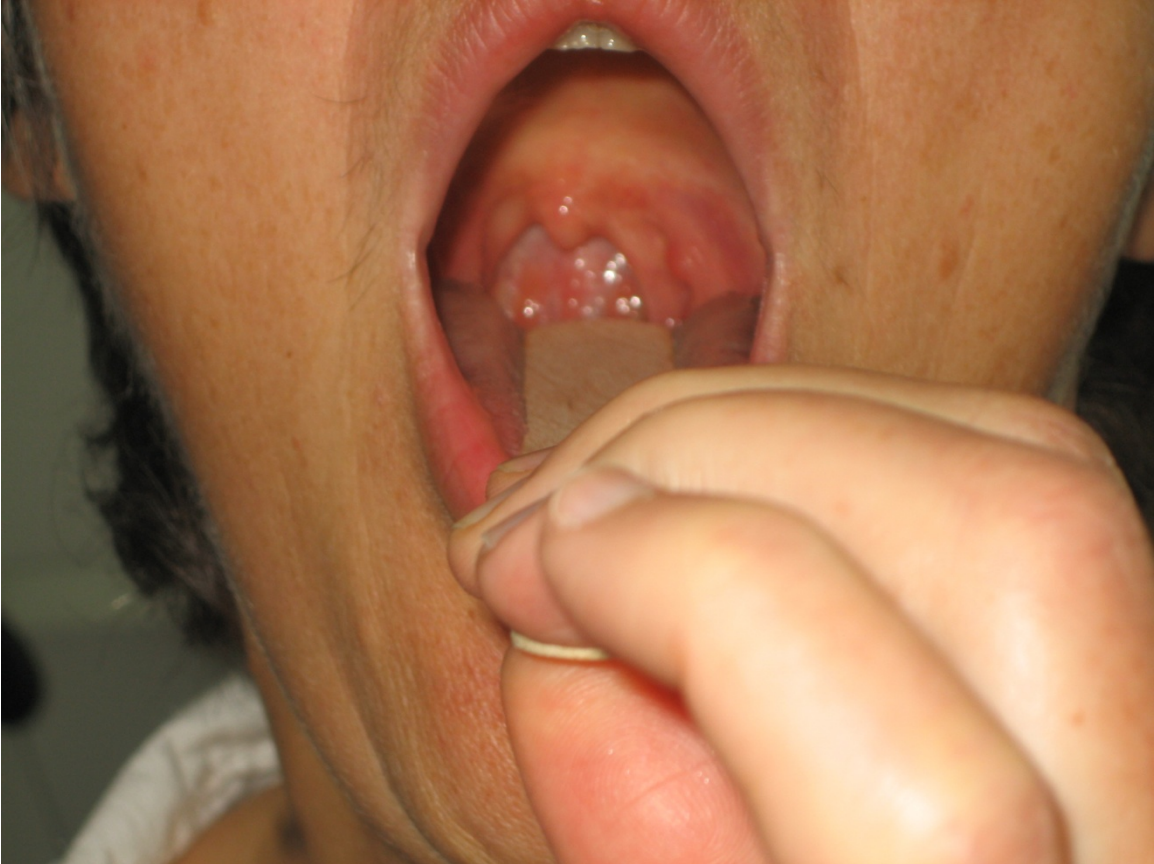

Supplement: image-stein-1-at.pdf [file image-stein-1-at.pdf]
